# Supplementary material for: Genome-Wide Association Analysis of Adaptation Using Environmentally Predicted Traits
Source: PubMed Central journal article supplement (PMC4619680; doi:10.1371/journal.pgen.1005594), 2015-10-23

A.

### Common

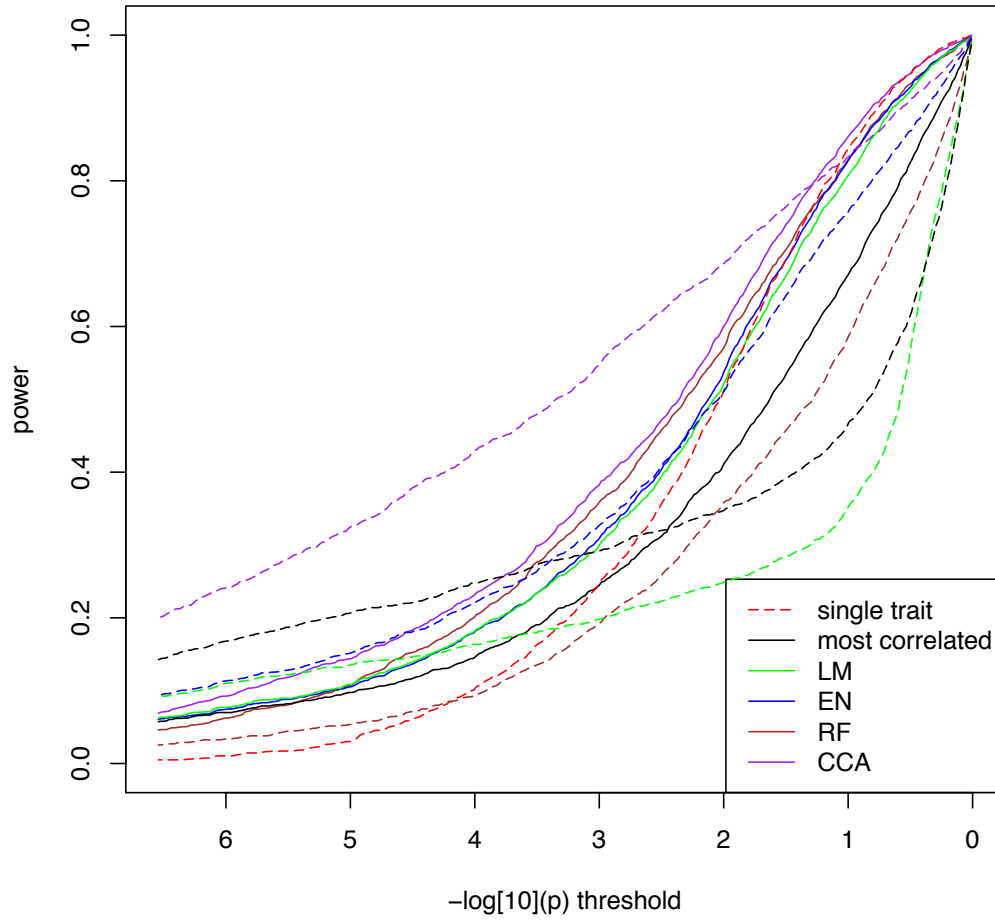

### Full

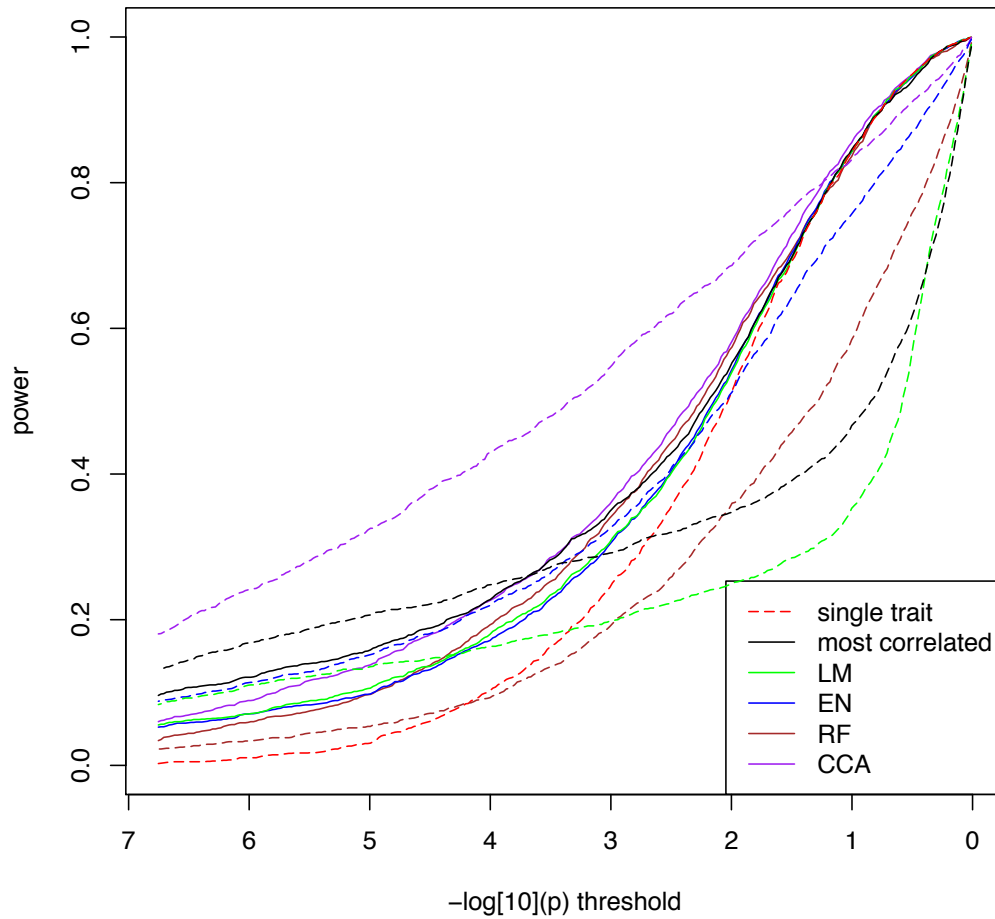

B.

### Common

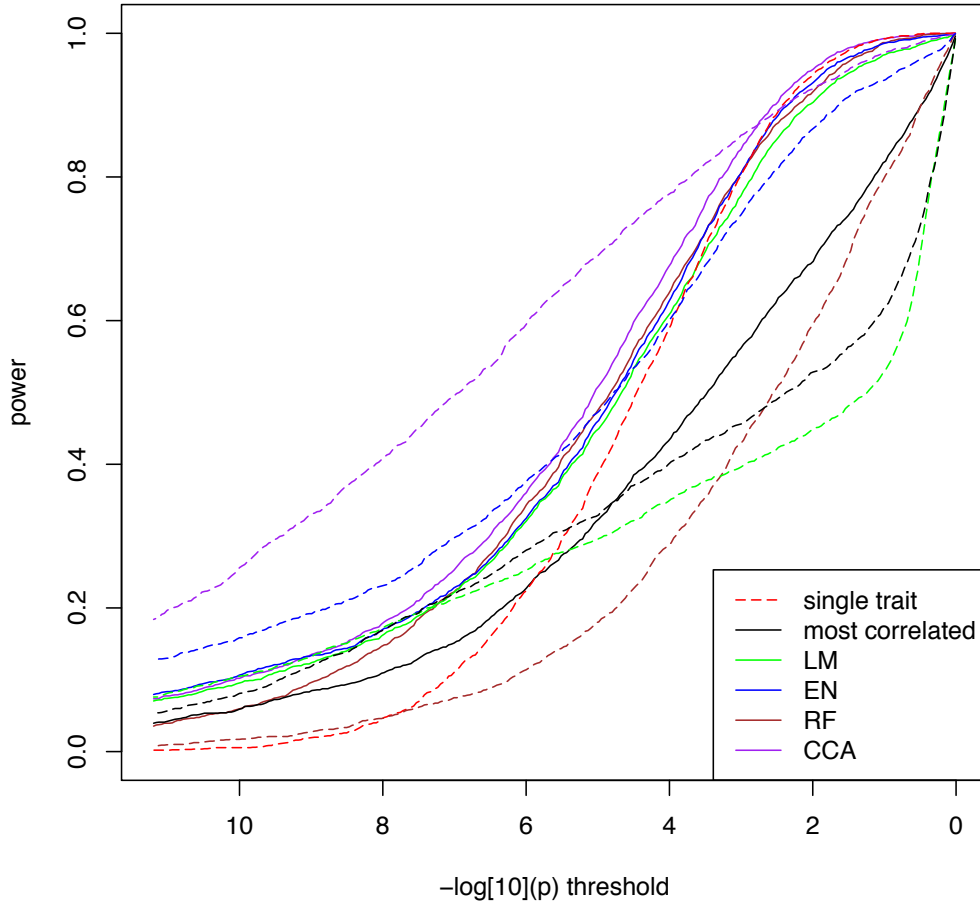

### Full

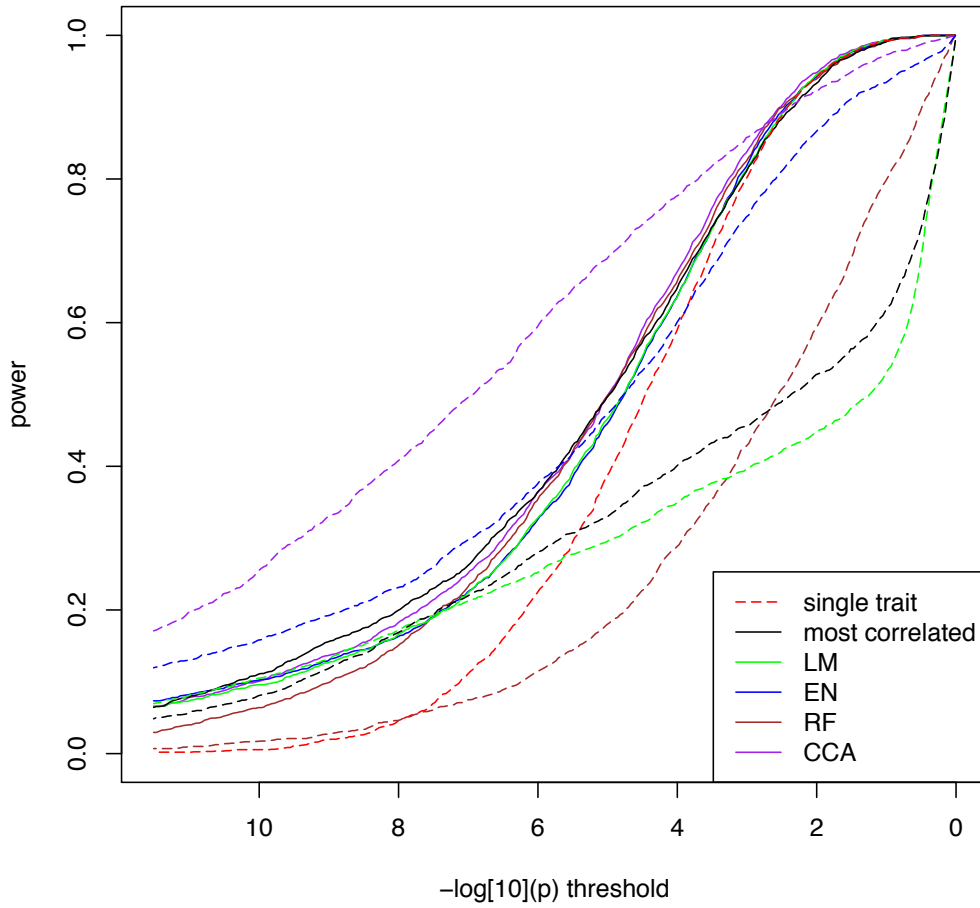

C.

### Common

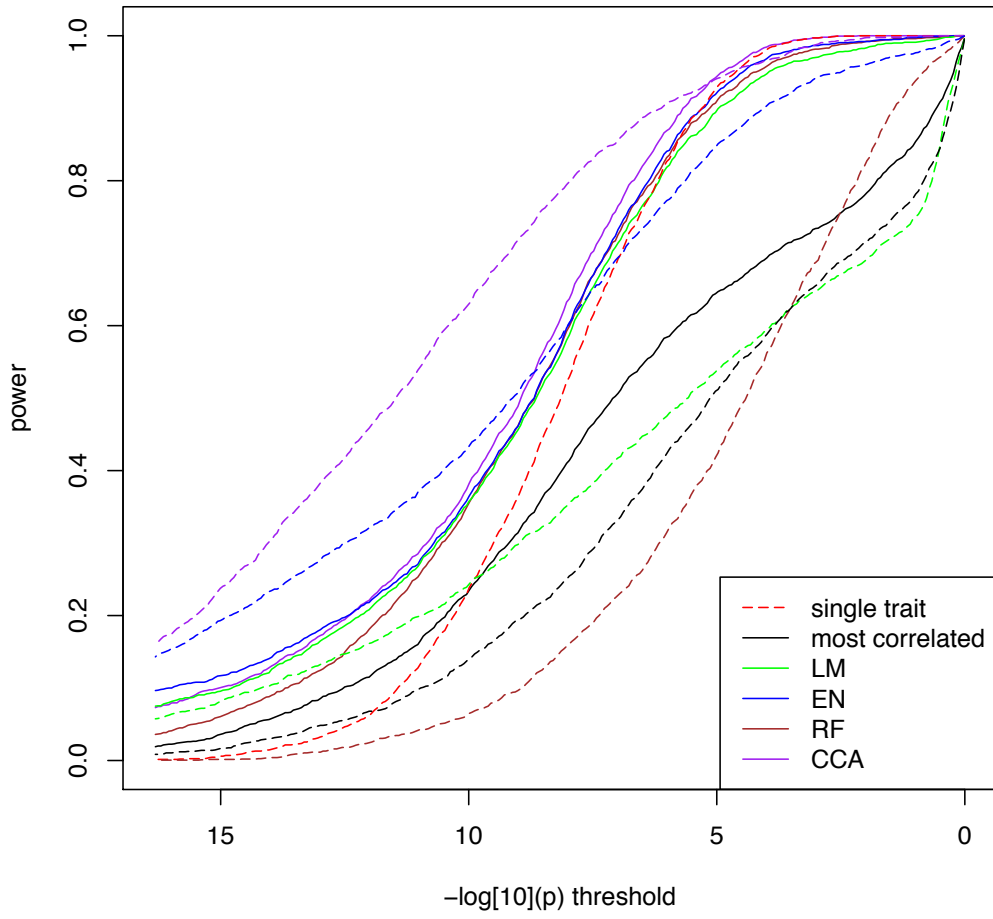

### Full

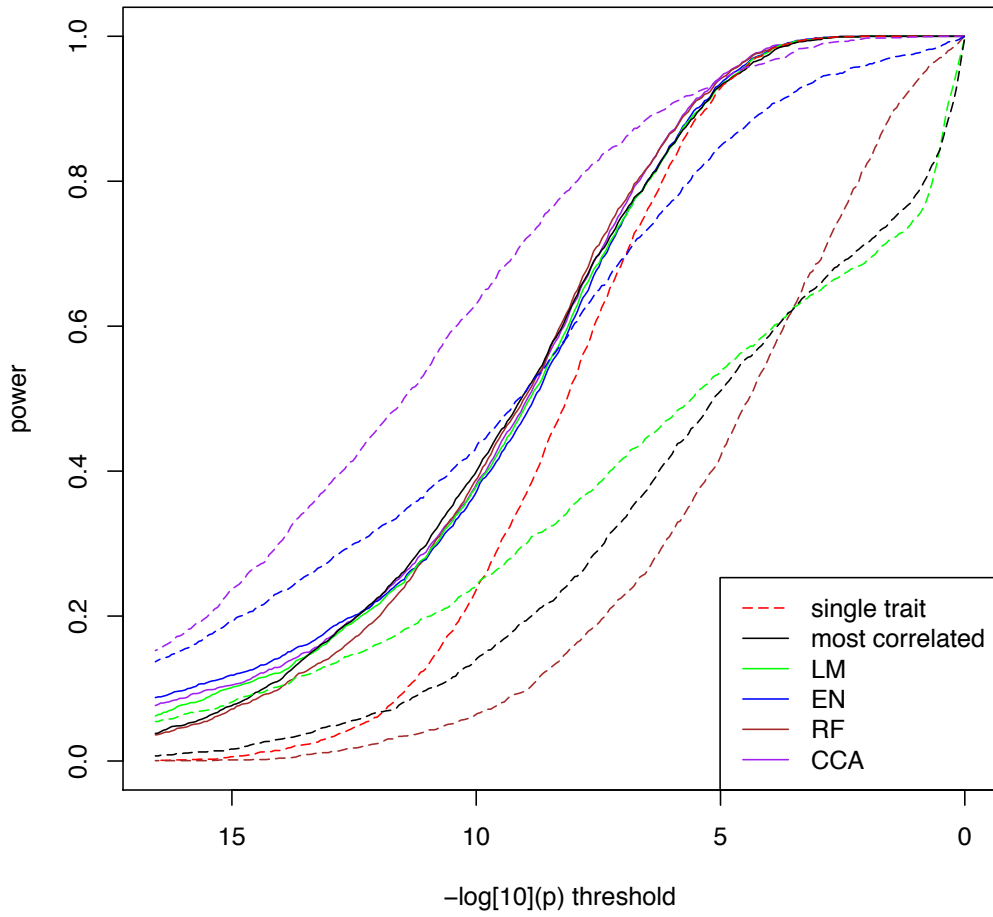

D.

### Common

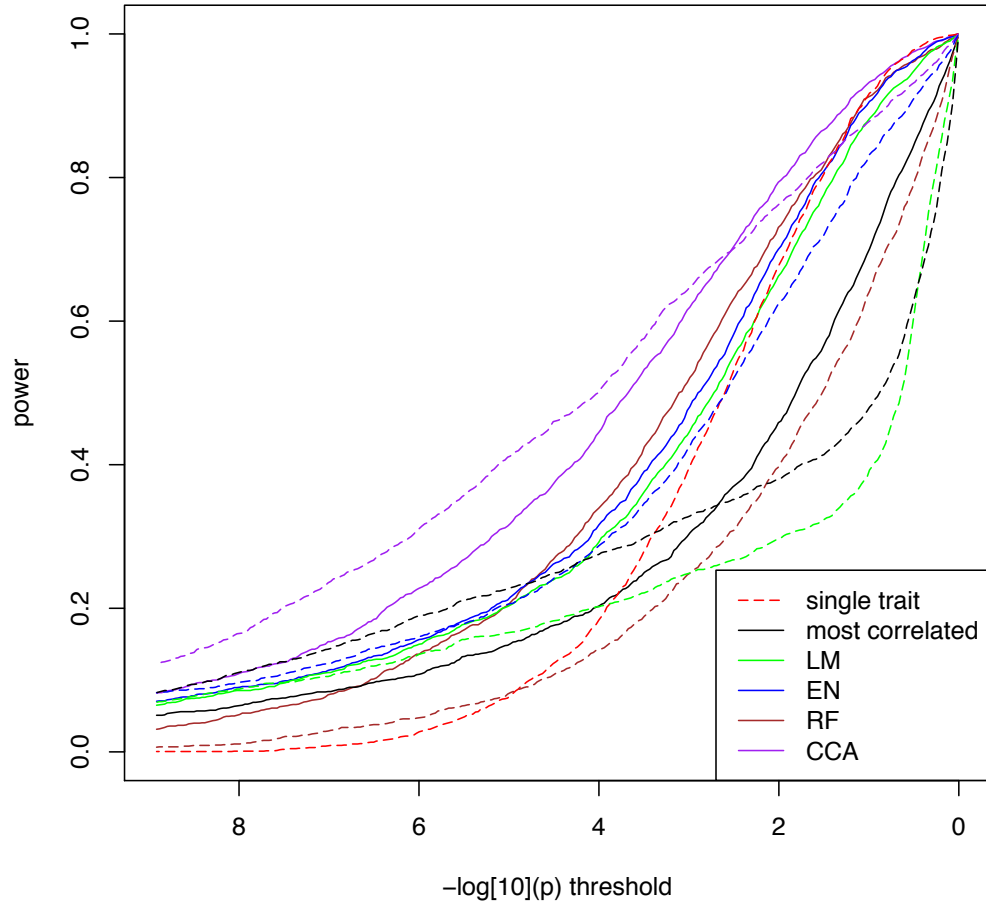

### Full

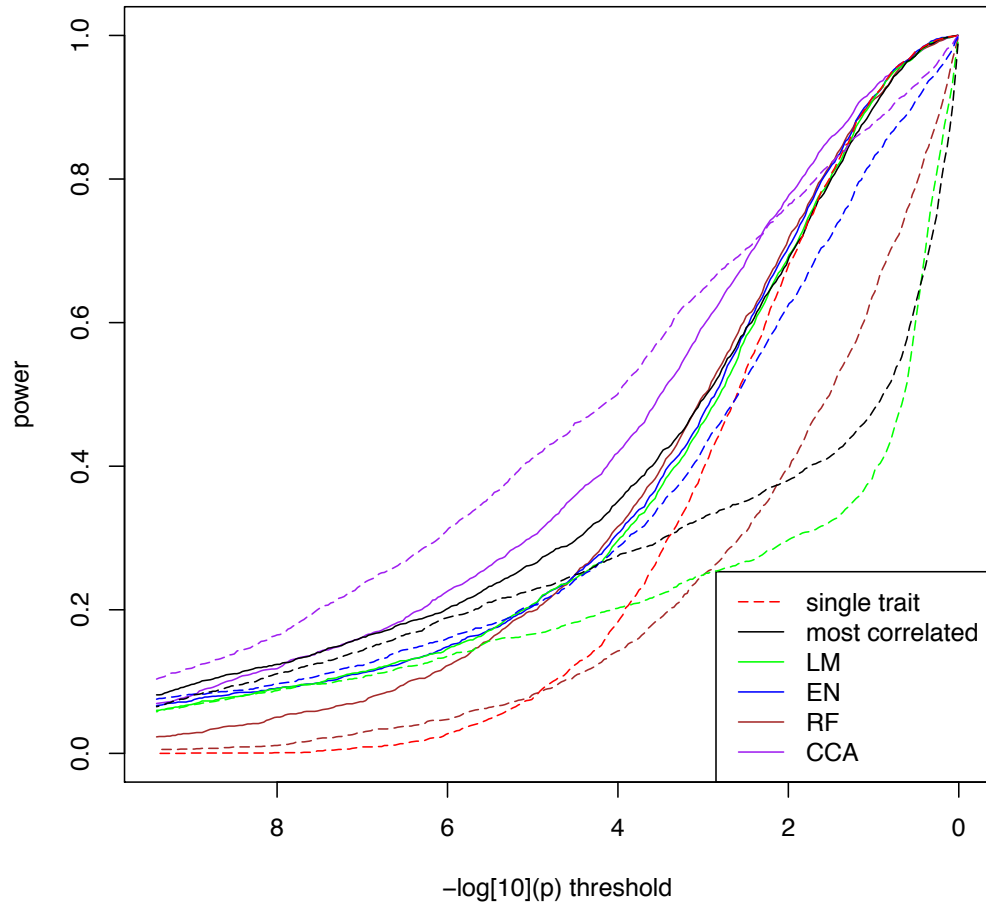

E.

### Common

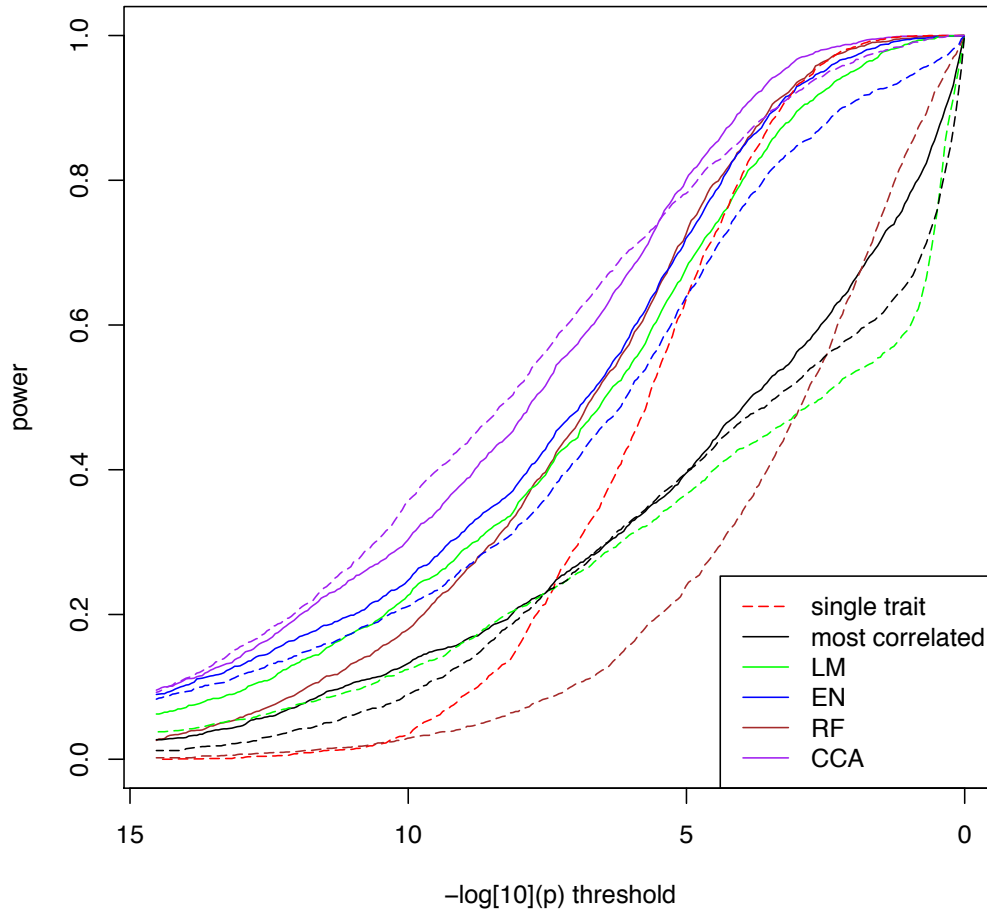

### Full

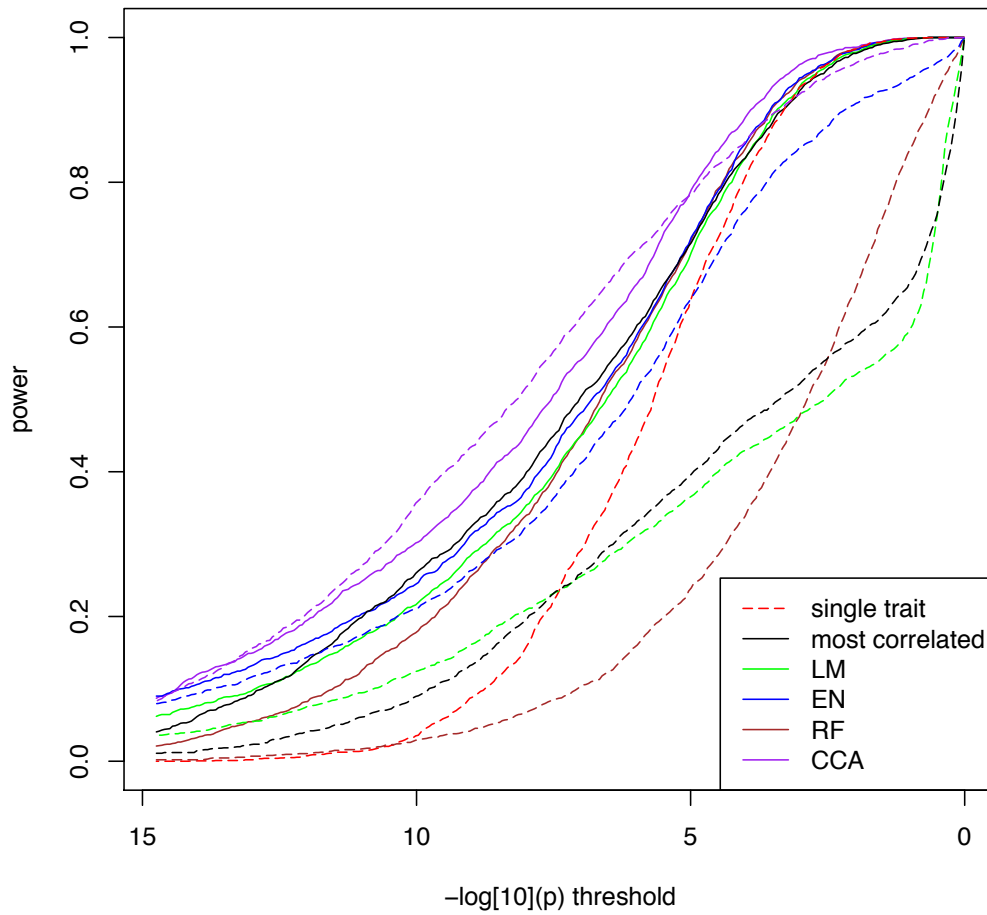

F.

### Common

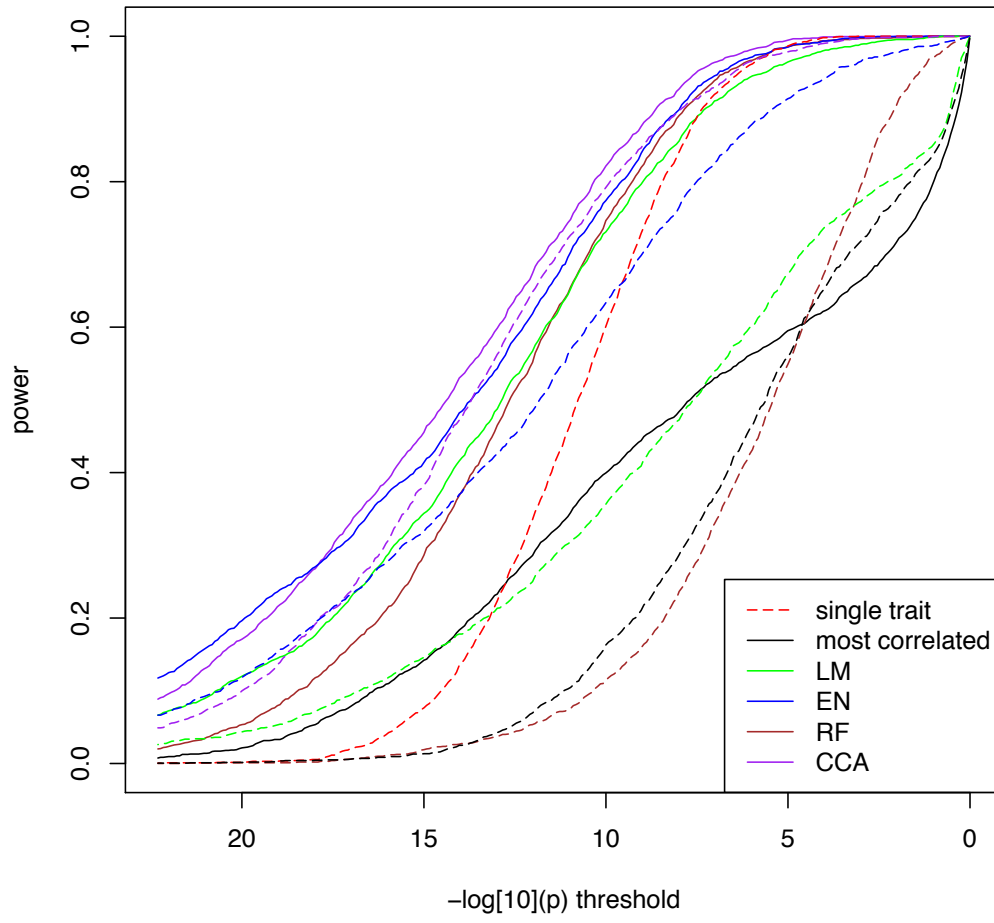

### Full

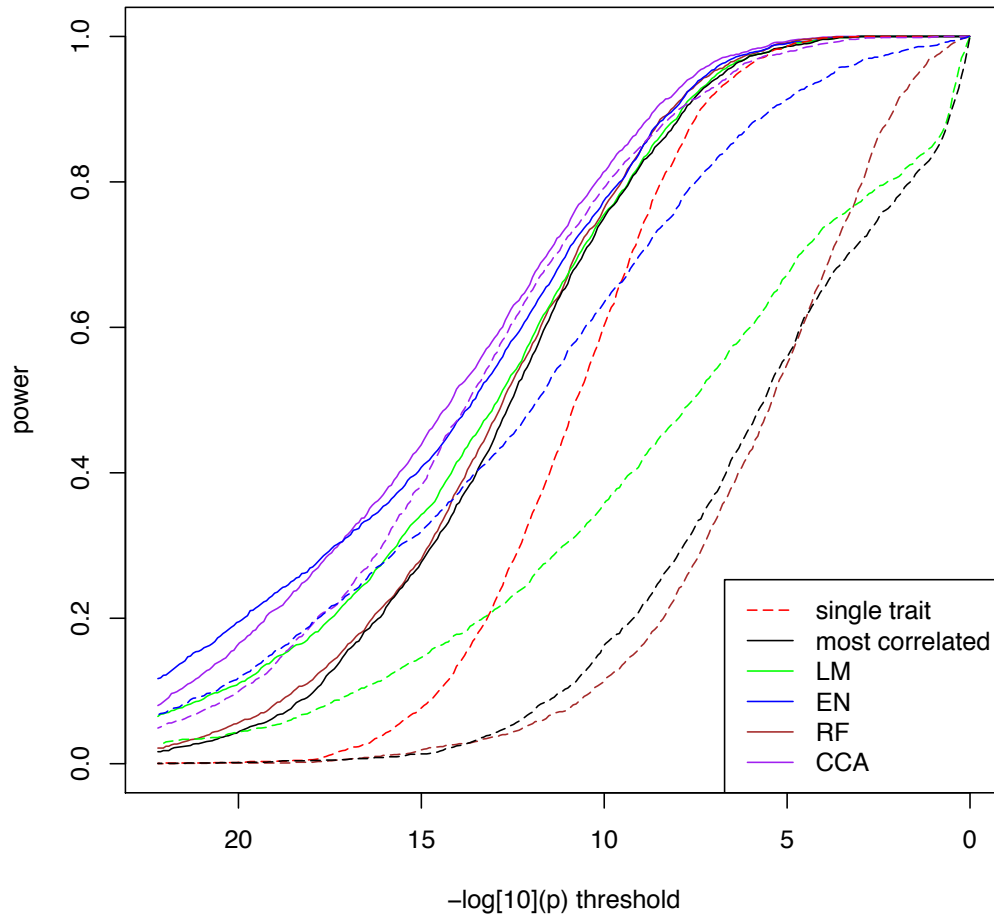

G.

### Common

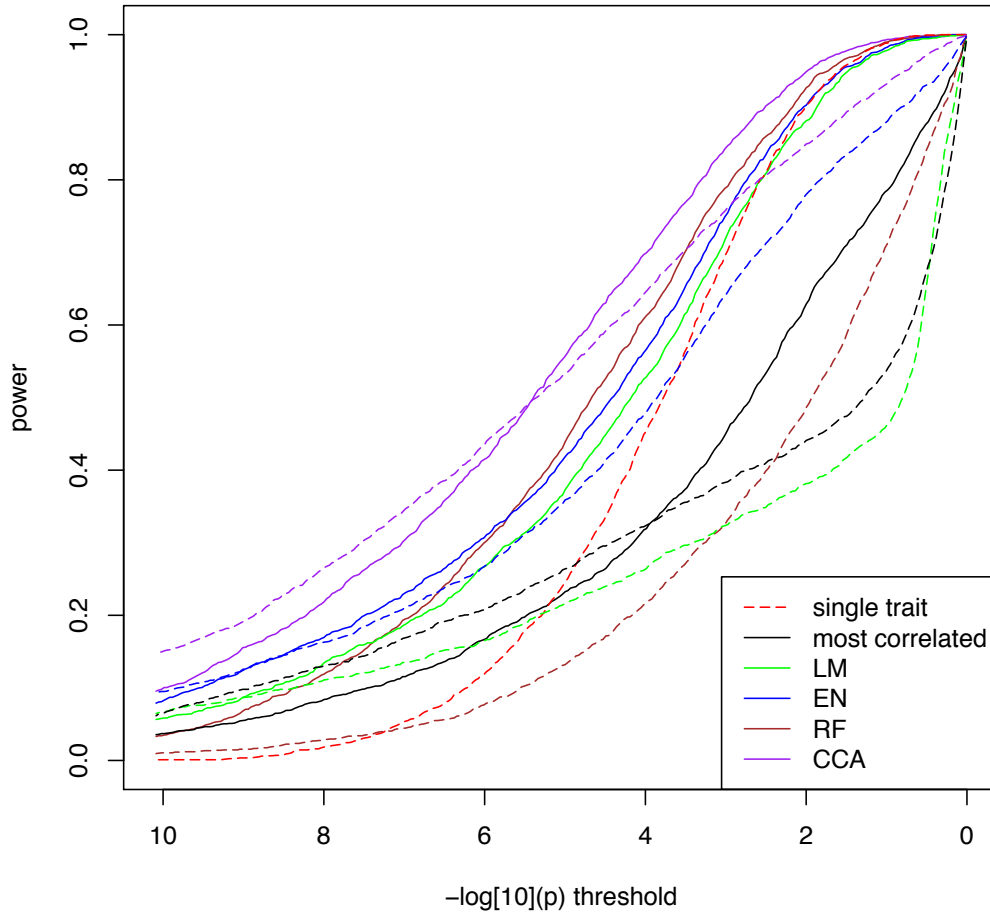

### Full

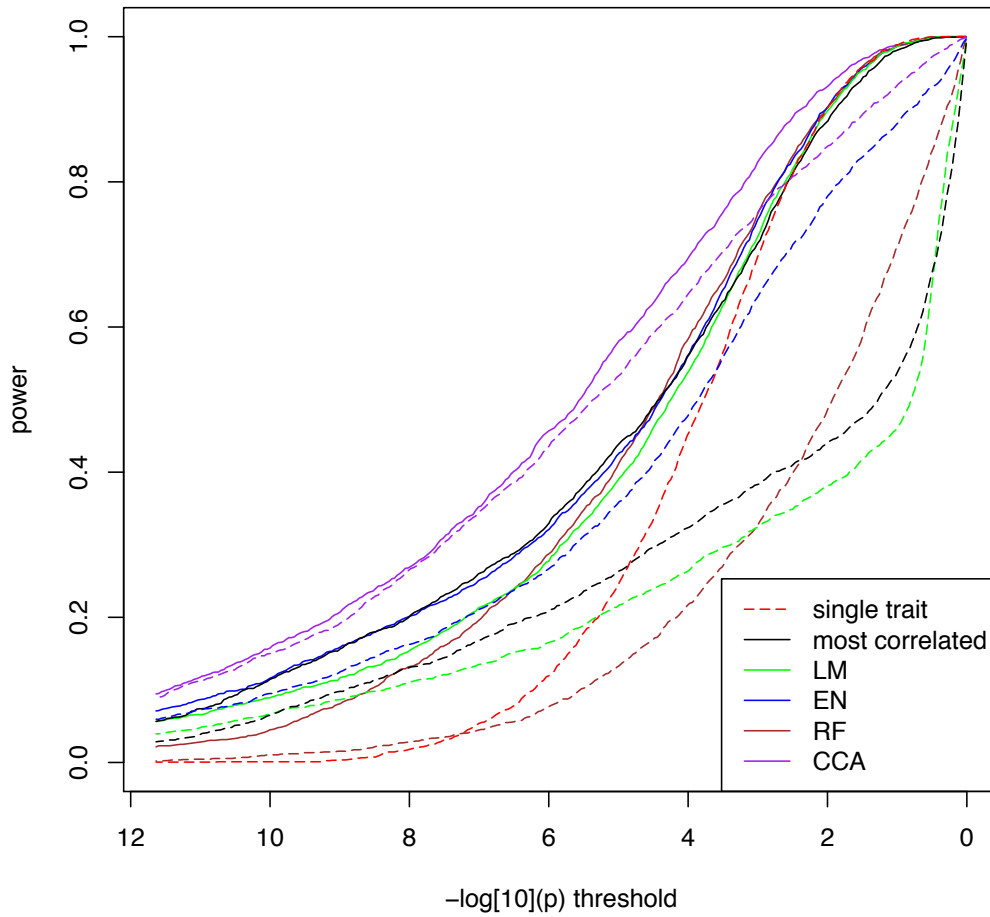

H.

### Common

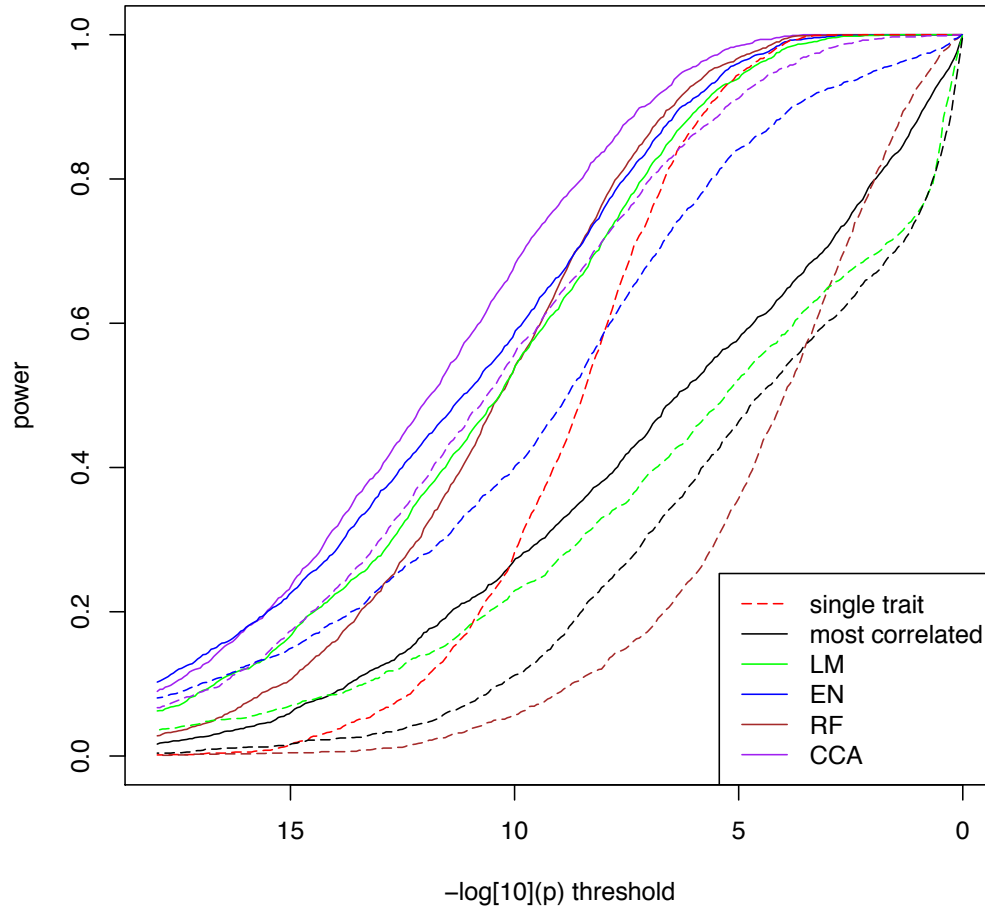

### Full

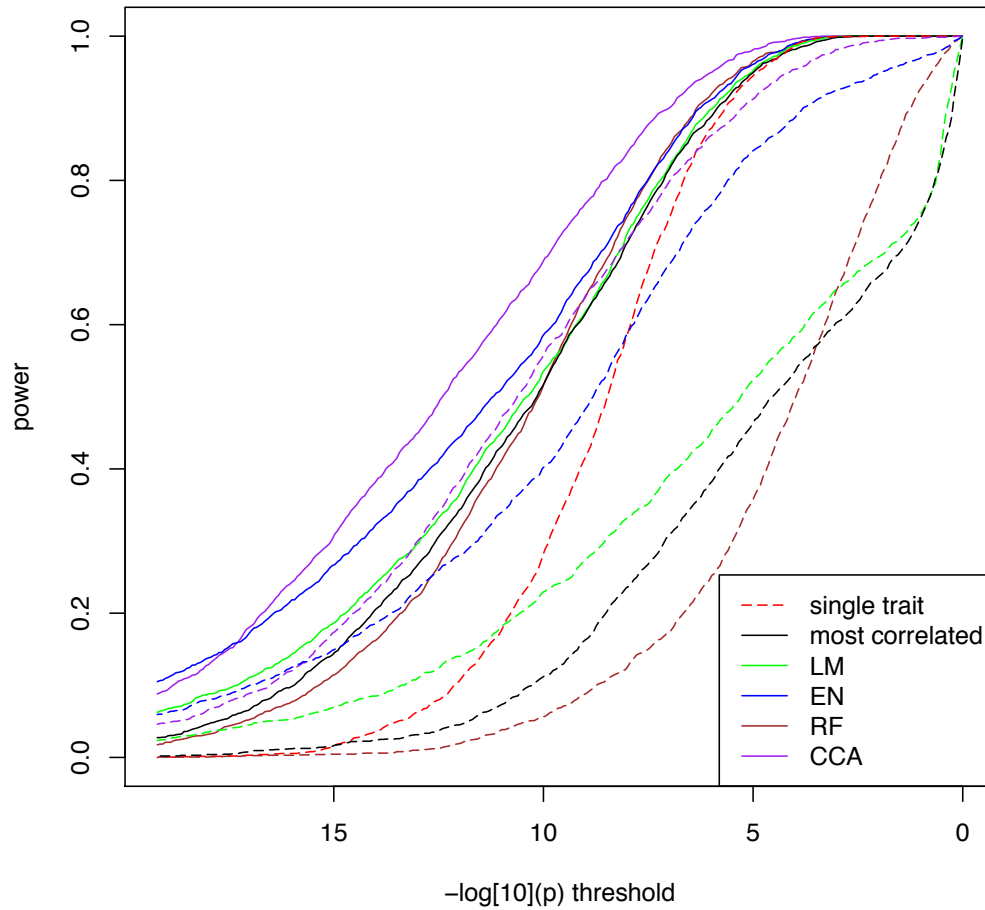



I.

### Common

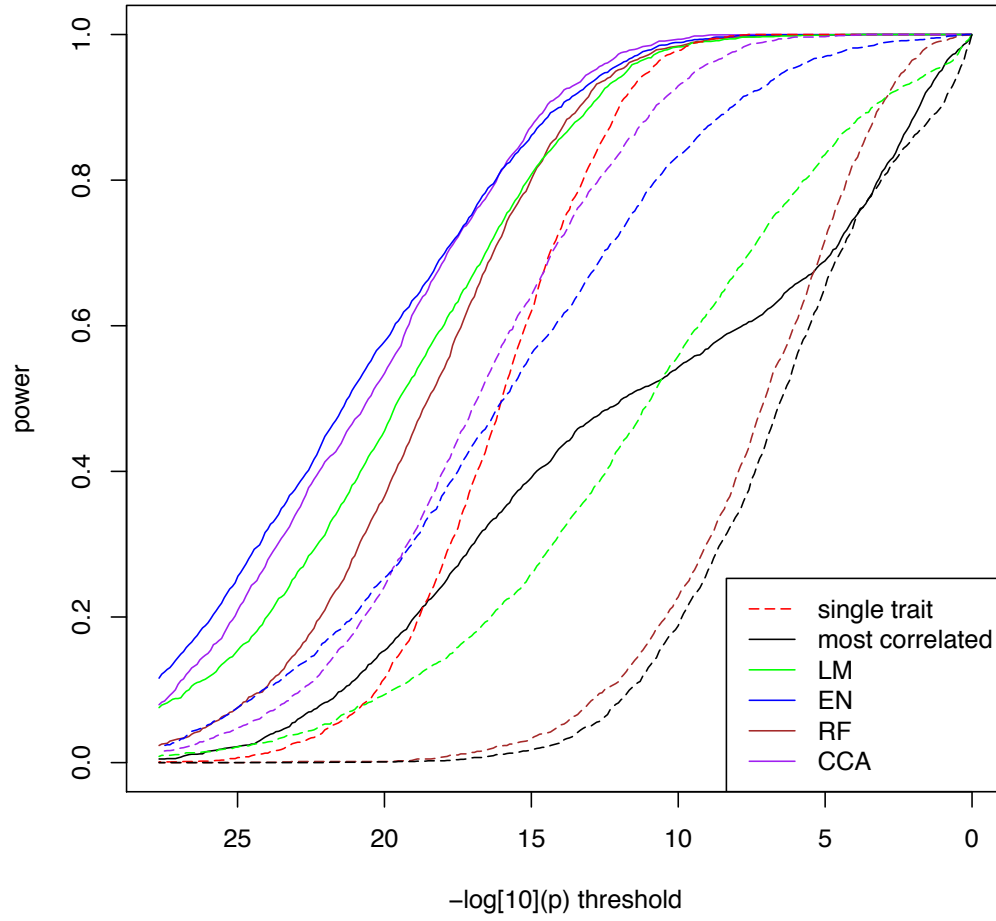

### Full

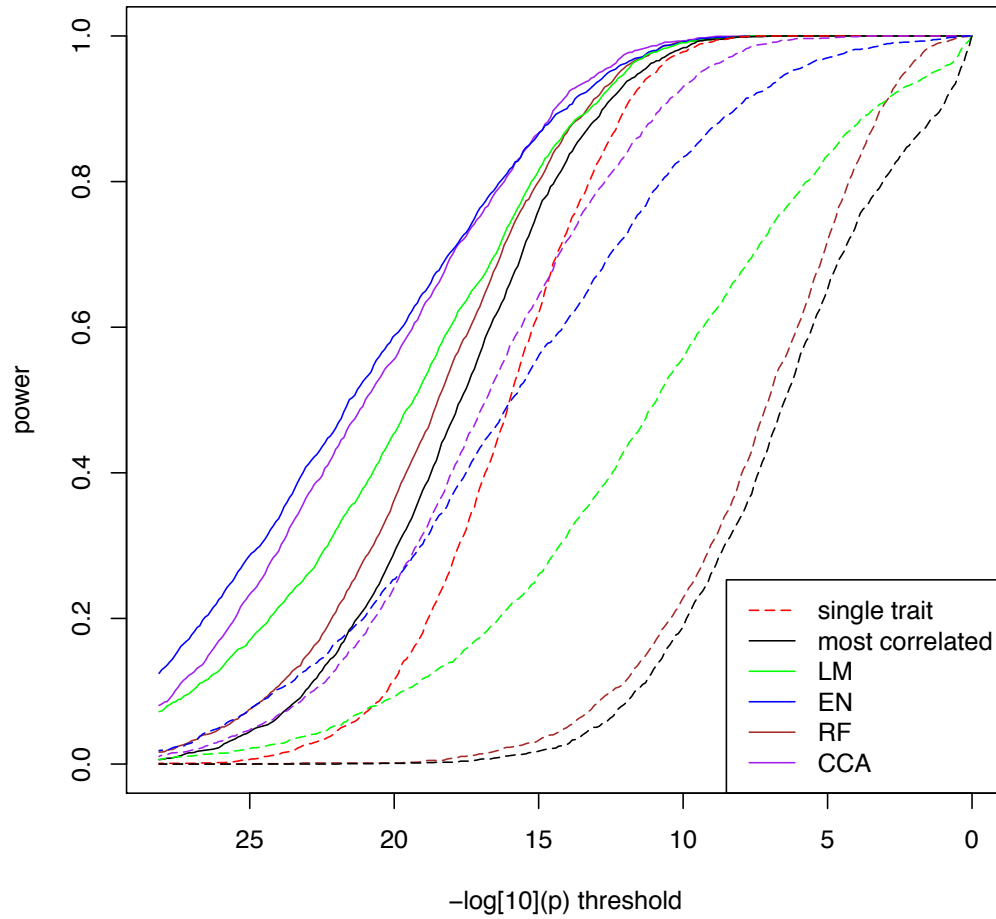

Supplement: pgen.1005594.s002.pdf [file pgen.1005594.s002.pdf]
