# Supplementary material for: Genome-Wide Association Analysis of Adaptation Using Environmentally Predicted Traits
Source: PubMed Central journal article supplement (PMC4619680; doi:10.1371/journal.pgen.1005594), 2015-10-23

**single trait**

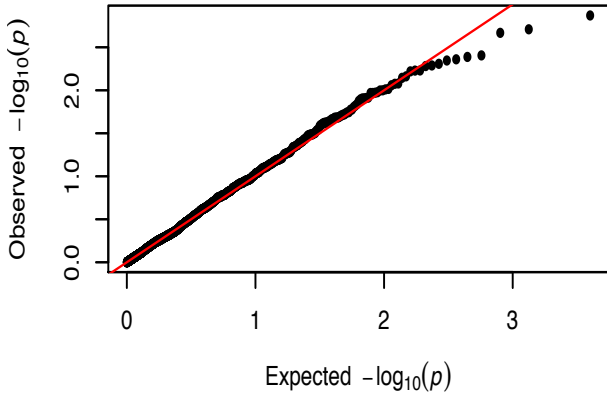

**most correlated**

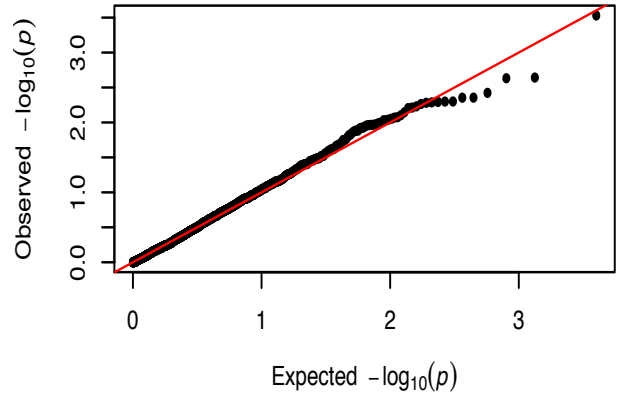

**LM**

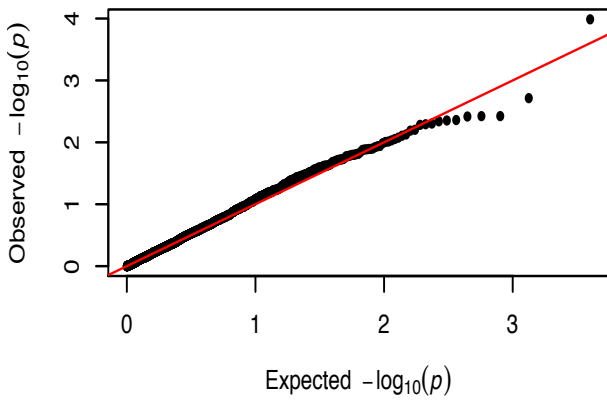

**EN**

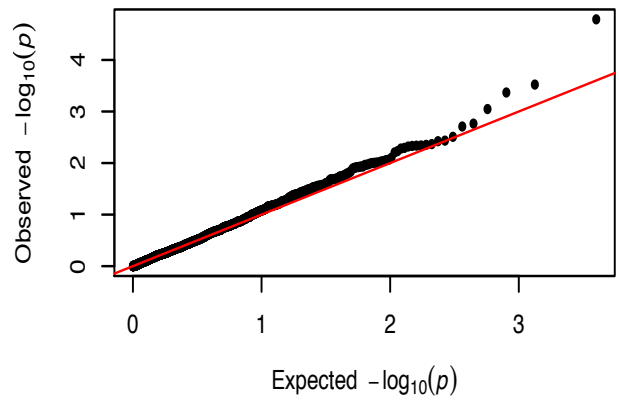

**RF**

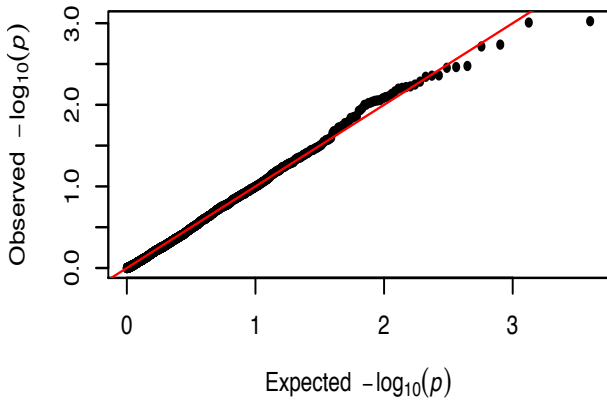

**CCA**

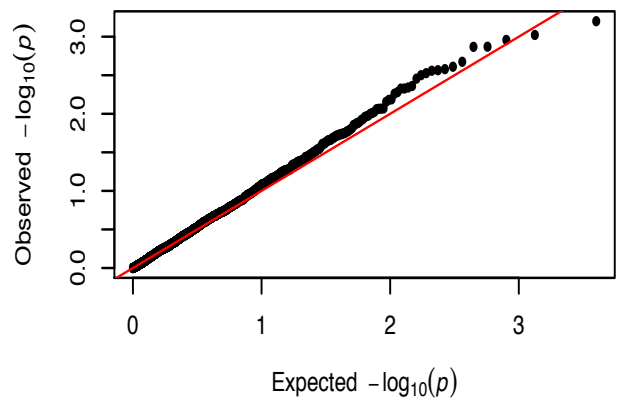

**single trait**

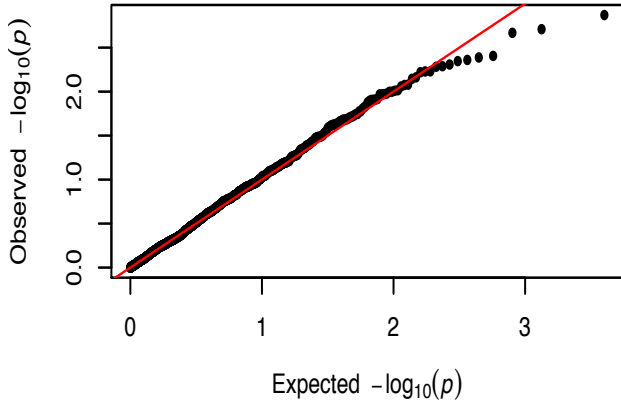

**most correlated**

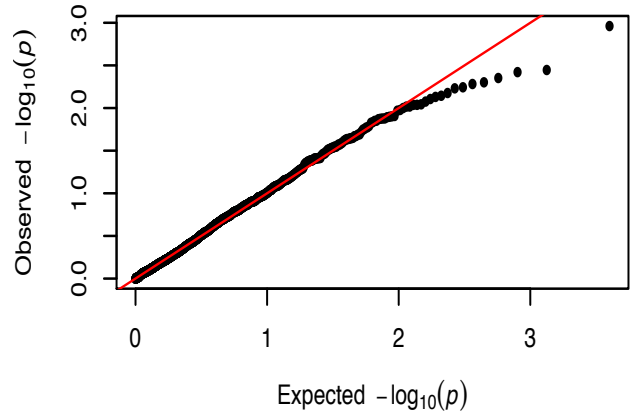

**LM**

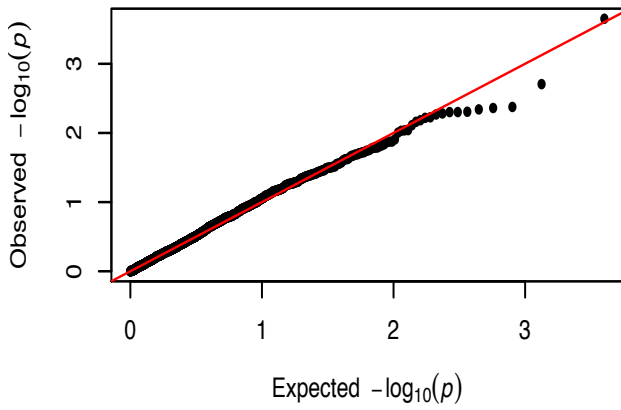

**EN**

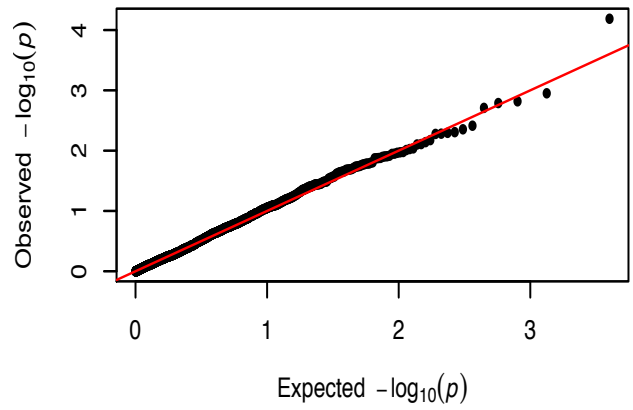

**RF**

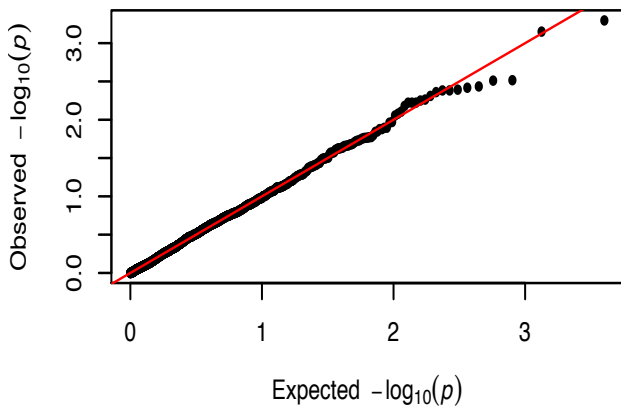

**CCA**

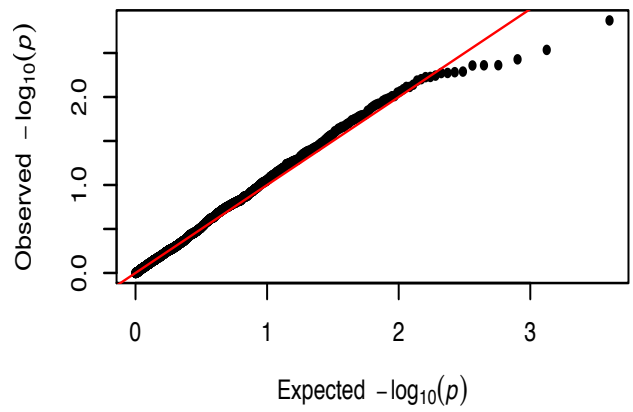

Supplement: pgen.1005594.s005.pdf [file pgen.1005594.s005.pdf]
