# Supplementary material for: Genome-Wide Association Analysis of Adaptation Using Environmentally Predicted Traits
Source: PubMed Central journal article supplement (PMC4619680; doi:10.1371/journal.pgen.1005594), 2015-10-23

### Common

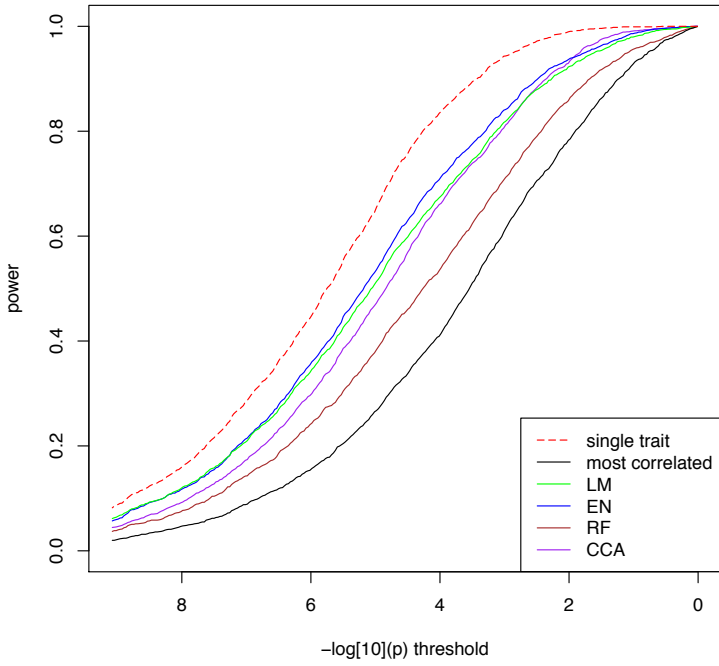

### Full

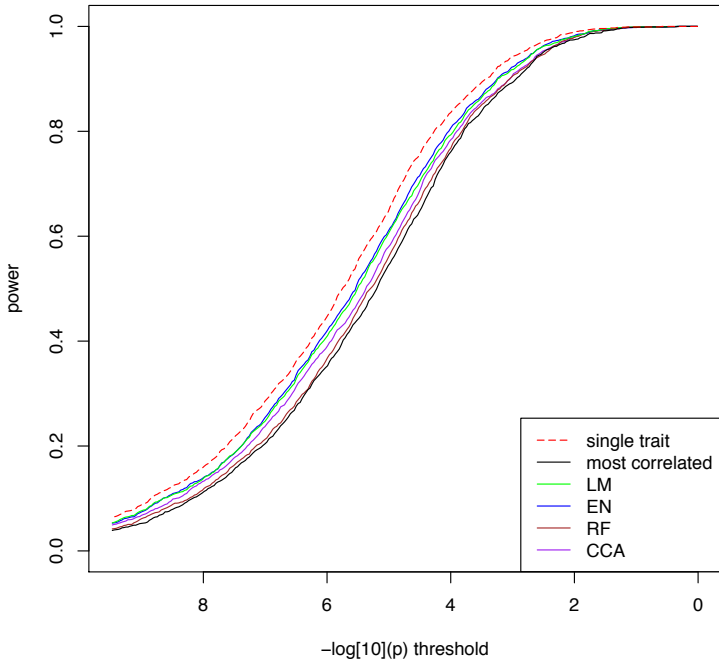

Supplement: pgen.1005594.s006.pdf [file pgen.1005594.s006.pdf]
